# Supplementary material for: Behavioural response of the malaria vector Anopheles gambiae to host plant volatiles and synthetic blends
Source: PubMed Central journal article supplement (PMC3523964; doi:10.1186/1756-3305-5-234), 2012-10-15

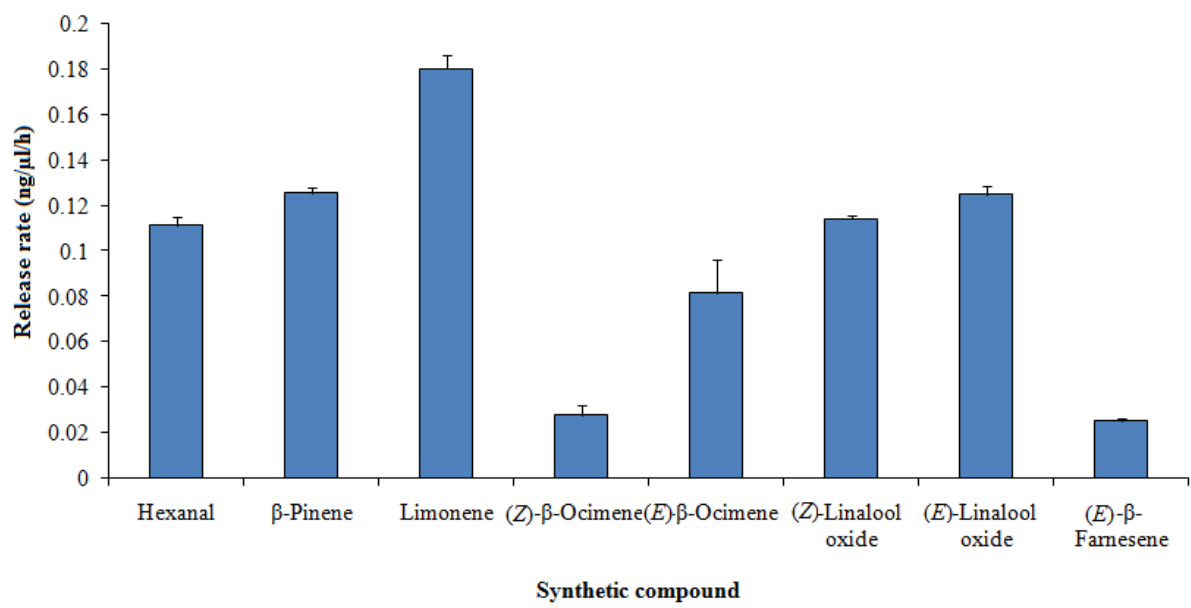

Supplement: 1756-3305-5-234-S1.pdf [file 1756-3305-5-234-S1.pdf]
